# Supplementary material
Source: publisher figshare collection journal article supplement (https://acs.figshare.com/ndownloader/files/3938353)
Supplement: Supplementary file 1 [file 3938353]

## Supporting Information

### Strong Collagen Hydrogels by Oxidized Dextran Modification

*Xia Zhang<sup>†</sup>, Yuhong Yang<sup>‡</sup>, Jinrong Yao<sup>†</sup>, Zhengzhong Shao<sup>†</sup>, Xin Chen<sup>\*†</sup>*

<sup>†</sup>State Key Laboratory of Molecular Engineering of Polymers, Department of Macromolecular Science, Laboratory of Advanced Materials, Fudan University, Shanghai, 200433, People's Republic of China

<sup>‡</sup>Research Centre for Analysis and Measurement, Fudan University, Shanghai 200433, People's Republic of China

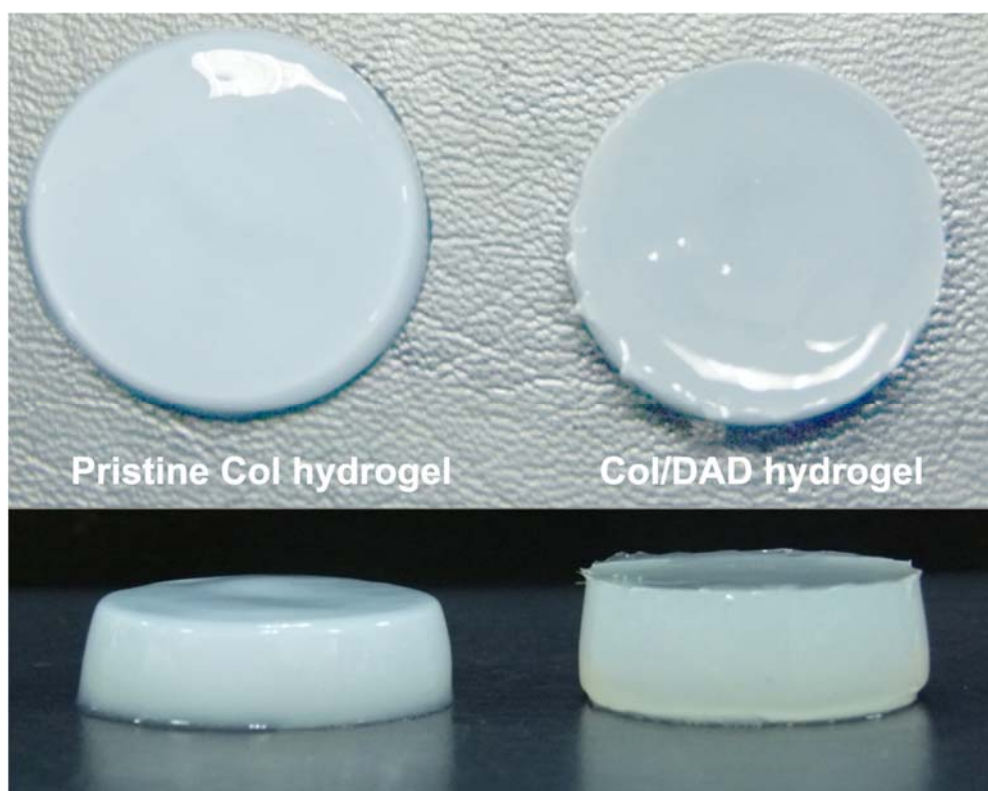

**Figure S1.** Digital photos of pristine Col hydrogel (left) and Col/DAD hydrogel (right) as-prepared.

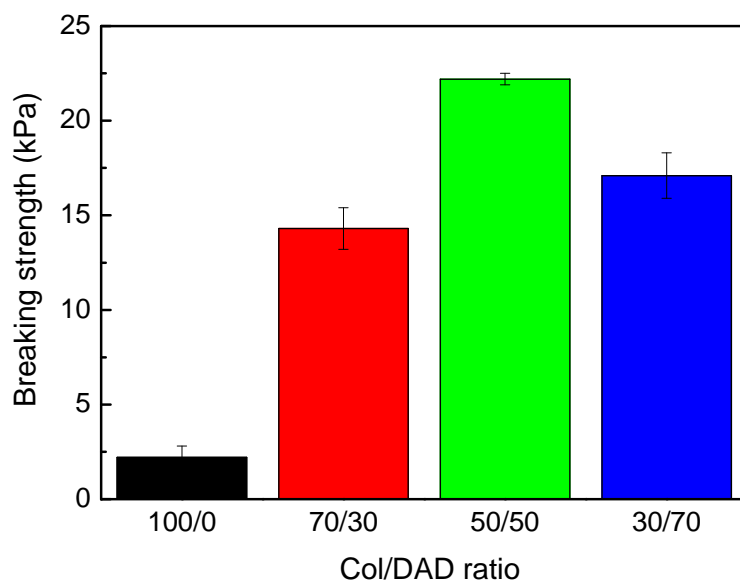

**Figure S2.** Comparison of the breaking compressive strength of the hydrogels with different Col/DAD ratio when adding dextran to keep the total solid content as a constant of 20 mg/mL ( $[\text{Col}] = 6 \text{ mg/mL}$ ).

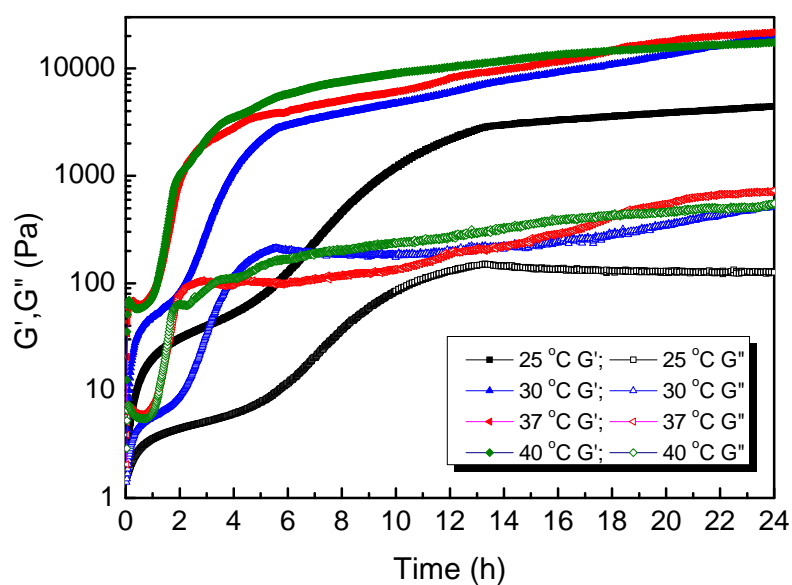

**Figure S3.** The change of storage modulus ( $G'$ ) and loss modulus ( $G''$ ) of the Col/DAD hydrogel (Col/DAD = 50/50) as a function of time under different incubation temperatures.

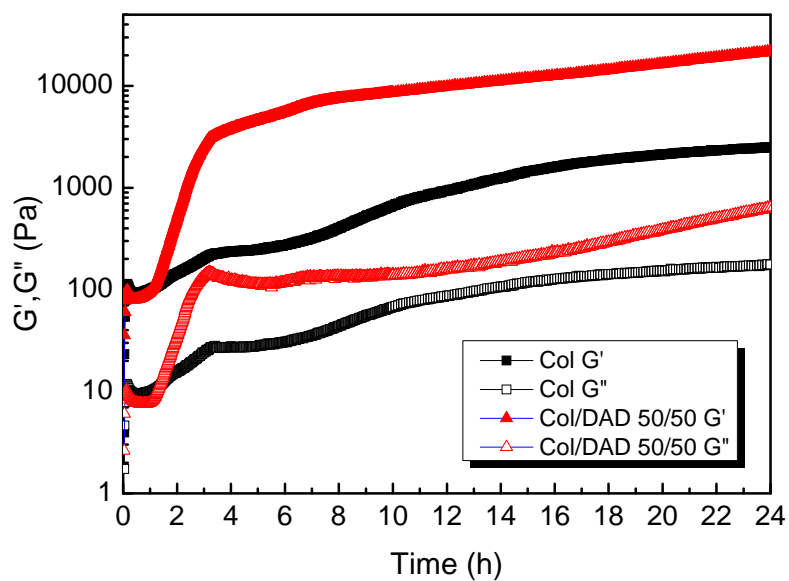

**Figure S4.** The comparison of storage modulus ( $G'$ ) and loss modulus ( $G''$ ) changes of the pristine Col and Col/DAD hydrogel (Col/DAD = 50/50) at 37 °C.

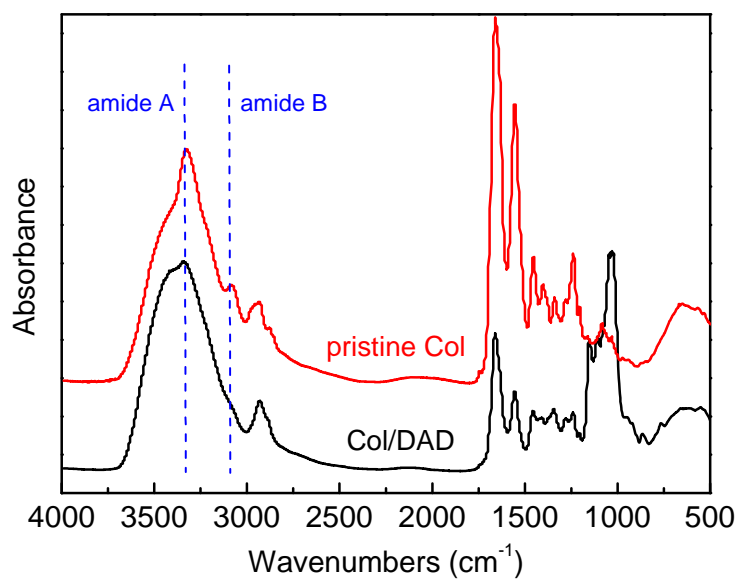

**Figure S5.** FTIR spectra of the pristine Col and Col/DAD hydrogel (Col/DAD = 50/50)

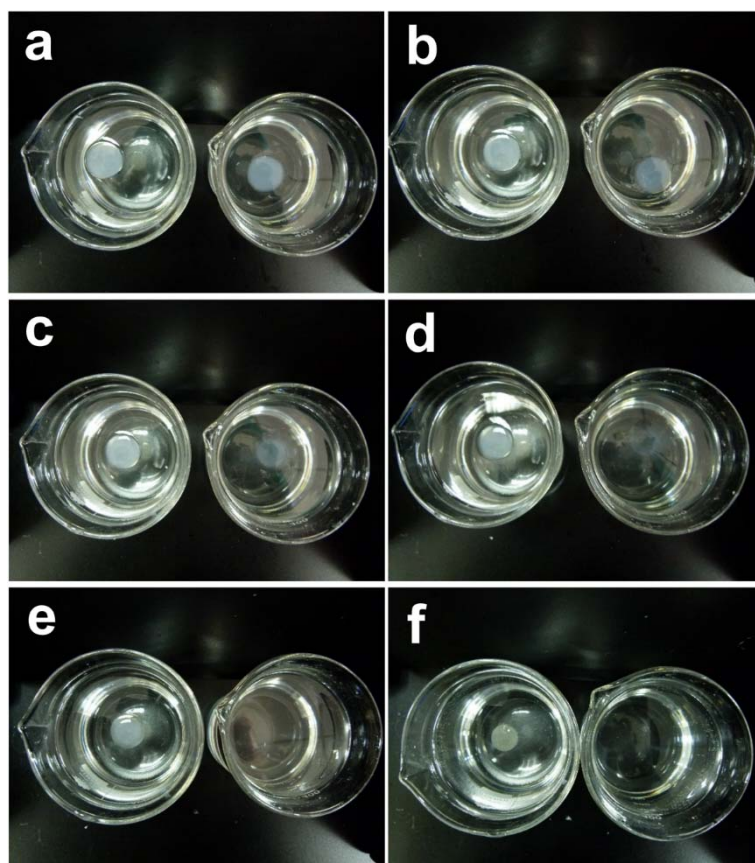

**Figure S6.** Digital photos of pristine Col (right) and Col/DAD hydrogel (Col/DAD = 50/50, left) immersing in 8 mol/L guanidine hydrochloride solution at different time. (a) 0 min, (b) 5 min, (c) 10 min, (d) 20 min, (e) 30 min, (f) 10 h.
